# Supplementary material for: Molecular Hydrogen Improves Rice Storage Quality via Alleviating Lipid Deterioration and Maintaining Nutritional Values
Source: MDPI journal article supplement (doi:10.3390/plants11192588), 2022-09-30
Supplement: s1 [file s1]

## **Supplementary Information**

### **Molecular hydrogen improves rice storage quality via alleviating lipid deterioration and maintaining nutritional values**

Chenxu Cai, Zhushan Zhao, Yingying Zhang, Min Li, Longna Li, Pengfei  
Cheng, Wenbiao Shen\*

College of Life Sciences, Laboratory Center of Life Sciences, Nanjing  
Agricultural University, Nanjing 210095, China

\*Corresponding author: Wenbiao Shen

E-mail: [wbsenh@njau.edu.cn](mailto:wbsenh@njau.edu.cn)

Tel: +86-025-84399032;

Table S1 Primers of qPCR used in this study

| Gene                         | Forward primer (5'-3')   | Reverse primer (5'-3')     |
|------------------------------|--------------------------|----------------------------|
| <i>OsActin</i> (45)          | CACGTGAGCAAGGCTCTTTTG    | GGCATCCCCCTCCTCATAGA       |
| <i>OsUBIQUITIN</i> (46)      | GACGGACGCACCCTGGCGAACTAC | TGCTGCCAATTACCATATACCACGAC |
| <i>OsLOX1</i> (XM_015771289) | TTCTTCACCGTCAAGTCGT      | TCCGAGAACTGCTCGTC          |
| <i>OsLOX2</i> (48)           | TACAAGTCCGACGAGGAGGT     | CCACATGATGGTGGTCAAGA       |
| <i>OsLOX3</i> (49)           | TCGCATTGGCTCGCACCT       | TCGTCTTCTTCAGCCGCACGAT     |

*OsActin* (reference gene), *beta-actin*; *OsUBIQUITIN* (reference gene), *ubiquitin*; *OsLOX1*, *lipoxygenase 1*; *OsLOX2*, *lipoxygenase 2*; *OsLOX3*, *lipoxygenase 3*.

48. Yang, J.; Wang, Y.; Liu, L.; Liu, L.; Wang, C.; Wang, C.; Li, C. Effects of exogenous salicylic acid and pH on pathogenicity of biotrophy-associated secreted protein 1 (BAS1)-overexpressing strain, *Magnaporthe oryzae*. *Environ. Sci. Pollut. Res.* **2018**, *26*, 13725–13737. <https://doi.org/10.1007/s11356-018-2532-y>.
49. Xu, H.; Wei, Y.; Zhu, Y.; Lian, L.; Xie, H.; Cai, Q.; Chen, Q.; Lin, Z.; Wang, Z.; Xie, H.; et al. Antisense suppression of *LOX3* gene expression in rice endosperm enhances seed longevity. *Plant Biotechnol. J.* **2014**, *13*, 526–539. <https://doi.org/10.1111/pbi.12277>.

Table S2 Profiles of volatiles in one year stored rice (Huruan 1212). Concentrations of volatile compounds were expressed as  $\mu\text{g kg}^{-1}$  of rice fresh weight, equivalent to 2,4,6-trimethylpyridine (TMP). Values were mean  $\pm$  SD. ND: not detected; Con: Control, irrigated with ditch water; HNW: irrigated with hydrogen nanobubble water.

| Family    | Number | Compound               | MW     | MF                                        | Compound<br>CID | Content ( $\mu\text{g kg}^{-1}$ ) |                   |
|-----------|--------|------------------------|--------|-------------------------------------------|-----------------|-----------------------------------|-------------------|
|           |        |                        |        |                                           |                 | Con                               | HNW               |
| Aldehydes | 1      | Pentanal               | 86.13  | $\text{C}_5\text{H}_{10}\text{O}$         | 8063            | 19.77 $\pm$ 2.68                  | 6.62 $\pm$ 0.77   |
|           | 2      | Hexanal                | 100.16 | $\text{C}_6\text{H}_{12}\text{O}$         | 6184            | 270.10 $\pm$ 19.03                | 183.71 $\pm$ 1.40 |
|           | 3      | Heptanal               | 114.19 | $\text{C}_7\text{H}_{14}\text{O}$         | 8130            | 23.68 $\pm$ 1.86                  | 12.73 $\pm$ 0.68  |
|           | 4      | Benzaldehyde           | 106.12 | $\text{C}_7\text{H}_6\text{O}$            | 240             | 17.62 $\pm$ 1.18                  | 32.25 $\pm$ 1.55  |
|           | 5      | Octanal                | 128.21 | $\text{C}_8\text{H}_{16}\text{O}$         | 454             | 17.30 $\pm$ 2.49                  | 11.56 $\pm$ 0.57  |
|           | 6      | (E)-2-Octenal          | 126.20 | $\text{C}_8\text{H}_{14}\text{O}$         | 5283324         | 20.02 $\pm$ 0.79                  | 18.99 $\pm$ 1.48. |
|           | 7      | Nonanal                | 142.24 | $\text{C}_9\text{H}_{18}\text{O}$         | 31289           | 74.98 $\pm$ 2.97                  | 106.8 $\pm$ 6.05  |
|           | 8      | (E)-2-Nonenal          | 140.22 | $\text{C}_9\text{H}_{16}\text{O}$         | 5283335         | 12.84 $\pm$ 0.39                  | 9.47 $\pm$ 2.08   |
|           | 9      | Decanal                | 156.26 | $\text{C}_{10}\text{H}_{20}\text{O}$      | 8175            | 22.36 $\pm$ 1.05                  | 28.89 $\pm$ 2.74  |
|           | 10     | Undecanal              | 170.29 | $\text{C}_{11}\text{H}_{22}\text{O}$      | 8186            | 3.51 $\pm$ 0.13                   | 5.53 $\pm$ 0.12   |
|           | 11     | 2-Butyl-2-octenal      | 182.30 | $\text{C}_{12}\text{H}_{22}\text{O}$      | 5362697         | 5.43 $\pm$ 0.50                   | 3.01 $\pm$ 0.25   |
| Alcohols  | 1      | Ethanol                | 46.07  | $\text{C}_2\text{H}_6\text{O}$            | 702             | ND                                | 3.84 $\pm$ 0.38   |
|           | 2      | 1-Pentanol             | 88.15  | $\text{C}_5\text{H}_{12}\text{O}$         | 6276            | 22.05 $\pm$ 2.48                  | 24.68 $\pm$ 1.57  |
|           | 3      | 1-Hexanol              | 102.17 | $\text{C}_6\text{H}_{14}\text{O}$         | 8103            | 82.58 $\pm$ 11.22                 | 98.49 $\pm$ 4.08  |
|           | 4      | 1-Heptanol             | 116.20 | $\text{C}_7\text{H}_{16}\text{O}$         | 8129            | 7.37 $\pm$ 0.57                   | 10.09 $\pm$ 0.82  |
|           | 5      | 1-Octen-3-ol           | 128.21 | $\text{C}_8\text{H}_{16}\text{O}$         | 18827           | 35.92 $\pm$ 1.34                  | 21.88 $\pm$ 0.88  |
|           | 6      | Cis-linalool oxide     | 170.25 | $\text{C}_{10}\text{H}_{18}\text{O}_{22}$ | 6428573         | 6.21 $\pm$ 0.27                   | 8.03 $\pm$ 0.09   |
|           | 7      | Terpinen-4-ol          | 154.25 | $\text{C}_{10}\text{H}_{18}\text{O}$      | 11230           | 3.68 $\pm$ 0.06                   | 2.28 $\pm$ 0.05   |
|           | 8      | <i>p</i> -Menthan-1-ol | 156.26 | $\text{C}_{10}\text{H}_{20}\text{O}$      | 89437           | 13.94 $\pm$ 1.73                  | 9.16 $\pm$ 0.12   |
| Ketones   |        | Acetone                | 58.08  | $\text{C}_3\text{H}_6\text{O}$            | 180             | 10.34 $\pm$ 1.14                  | 15.22 $\pm$ 0.54  |
|           | 2      | 2-Heptanone            | 114.19 | $\text{C}_7\text{H}_{14}\text{O}$         | 8051            | 46.60 $\pm$ 1.46                  | 34.98 $\pm$ 1.06  |
|           | 3      | 4-Methyl-cyclohexanone | 112.17 | $\text{C}_7\text{H}_{12}\text{O}$         | 11525           | 9.65 $\pm$ 0.9                    | 6.96 $\pm$ 0.60   |

|                |   |                                              |        |                                                  |           |            |            |
|----------------|---|----------------------------------------------|--------|--------------------------------------------------|-----------|------------|------------|
| <b>Ketones</b> | 4 | 6-Methyl-5-hepten-2-one                      | 126.20 | C <sub>8</sub> H <sub>14</sub> O                 | 9862      | 12.93±1.16 | 24.80±1.68 |
|                | 5 | 3-Octen-2-one                                | 126.20 | C <sub>8</sub> H <sub>14</sub> O                 | 5363229   | 3.38±0.19  | 3.38±0.16  |
|                | 6 | (R,S)-5-Ethyl-6-methyl-3E-hepten-2-one       | 154.25 | C <sub>10</sub> H <sub>18</sub> O                | 146160920 | 12.42±1.33 | 7.42±0.34  |
|                | 7 | 6,10-Dimethyl-2-undecanone                   | 198.34 | C <sub>13</sub> H <sub>26</sub> O                | 95495     | 3.52±0.12  | 3.05±0.02  |
|                | 8 | Geranylacetone                               | 194.31 | C <sub>13</sub> H <sub>22</sub> O                | 1549778   | 11.86±0.80 | 17.06±0.41 |
|                | 9 | 6,10,14-trimethylpentadecan-2-one            | 268.50 | C <sub>18</sub> H <sub>36</sub> O                | 10408     | 4.23±0.58  | 2.47±0.17  |
| <b>Esters</b>  | 1 | Formic acid, octylester                      | 158.24 | C <sub>9</sub> H <sub>18</sub> O <sub>2</sub>    | 8176      | 19.10±1.66 | 20.47±0.18 |
|                | 2 | Dodecyl acrylate                             | 240.38 | C <sub>15</sub> H <sub>28</sub> O <sub>2</sub>   | 75084     | 17.17±1.56 | 12.98±0.61 |
|                | 3 | Sulfurous acid, octadecyl 2-propyl ester     | 376.60 | C <sub>21</sub> H <sub>44</sub> O <sub>3</sub> S | 6420358   | 7.74±0.66  | 7.61±0.17  |
|                | 4 | Octadecanoic acid, 2-oxo-, methyl ester      | 312.50 | C <sub>19</sub> H <sub>36</sub> O <sub>3</sub>   | 620002    | 5.71±0.18  | 5.65±0.14  |
|                | 5 | Dimethyl phthalate                           | 194.18 | C <sub>10</sub> H <sub>10</sub> O <sub>4</sub>   | 8554      | 5.81±0.41  | 8.43±0.48  |
| <b>Others</b>  | 1 | Acetic acid                                  | 60.05  | C <sub>2</sub> H <sub>4</sub> O <sub>2</sub>     | 176       | 16.20±5.19 | 9.59±0.52  |
|                | 2 | Ethylbenzene                                 | 106.16 | C <sub>8</sub> H <sub>10</sub>                   | 7500      | 3.32±0.58  | 9.61±1.09  |
|                | 3 | Undecane                                     | 156.31 | C <sub>11</sub> H <sub>24</sub>                  | 14257     | 3.80±0.26  | 4.25±0.06  |
|                | 4 | 2-Aminomethyl-5-methylamino-1,3,4-oxadiazole | 128.13 | C <sub>4</sub> H <sub>8</sub> N <sub>4</sub> O   | 581786    | 4.29±0.33  | 5.22±0.18  |
|                | 5 | Tridecane                                    | 184.36 | C <sub>13</sub> H <sub>28</sub>                  | 12388     | 4.61±0.17  | 6.54±0.48  |
|                | 6 | 5-pentyloxolan-2-one                         | 156.22 | C <sub>9</sub> H <sub>16</sub> O <sub>2</sub>    | 7710      | 8.21±0.76  | 10.34±0.47 |
|                | 7 | Hexadecane                                   | 226.44 | C <sub>16</sub> H <sub>34</sub>                  | 11006     | 3.48±0.18  | 3.05±0.57  |

Table S3 Profiles of hydrolyzed amino acids in stored rice (Huruan 1212). Contents were expressed as mg g<sup>-1</sup> of rice dry weight. Values were mean  $\pm$  SD. Con: Control, irrigated with ditch water; HNW: irrigated with hydrogen nanobubble water.

| Type          | Content (mg g <sup>-1</sup> )      |                                    |
|---------------|------------------------------------|------------------------------------|
|               | Con                                | HNW                                |
| Threonine     | 2.11 $\pm$ 0.10                    | 2.65 $\pm$ 0.06                    |
| Valine        | 2.25 $\pm$ 0.70                    | 3.51 $\pm$ 0.05                    |
| Methionine    | 0.29 $\pm$ 0.13                    | 0.27 $\pm$ 0.06                    |
| Isoleucine    | 1.88 $\pm$ 0.31                    | 2.36 $\pm$ 0.11                    |
| Leucine       | 4.18 $\pm$ 0.15                    | 4.95 $\pm$ 0.10                    |
| Phenylalanine | 2.76 $\pm$ 0.09                    | 3.40 $\pm$ 0.17                    |
| Histidine     | 1.54 $\pm$ 0.02                    | 1.84 $\pm$ 0.02                    |
| Lysine        | 2.41 $\pm$ 0.05                    | 2.80 $\pm$ 0.09                    |
| <b>Total</b>  | <b>17.44 <math>\pm</math> 1.21</b> | <b>21.80 <math>\pm</math> 0.28</b> |
| Aspartic acid | 6.07 $\pm$ 0.06                    | 6.89 $\pm$ 0.15                    |
| Serine        | 2.67 $\pm$ 0.20                    | 3.39 $\pm$ 0.09                    |
| Glutamate     | 11.46 $\pm$ 1.14                   | 14.12 $\pm$ 0.11                   |
| Glycine       | 3.30 $\pm$ 0.14                    | 3.68 $\pm$ 0.02                    |
| Alanin        | 3.70 $\pm$ 0.35                    | 4.29 $\pm$ 0.07                    |
| Cystine       | 0.99 $\pm$ 0.28                    | 0.68 $\pm$ 0.03                    |
| Tyrosine      | 2.08 $\pm$ 0.02                    | 2.60 $\pm$ 0.06                    |
| Arginine      | 5.15 $\pm$ 0.21                    | 6.24 $\pm$ 0.34                    |
| Proline       | 4.43 $\pm$ 1.47                    | 3.94 $\pm$ 0.05                    |
| <b>Total</b>  | <b>39.89 <math>\pm</math> 0.80</b> | <b>45.84 <math>\pm</math> 0.59</b> |

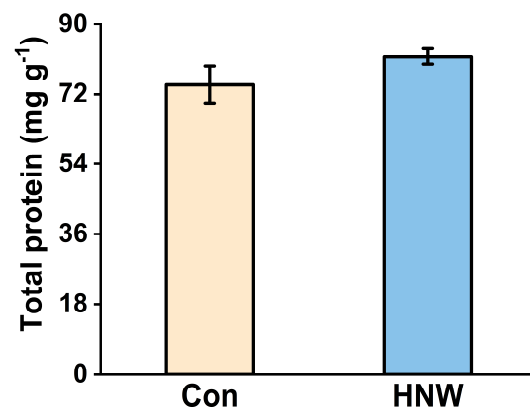

Figure S1 Profiles of total protein contents from different treatments in stored rice.

Values are means  $\pm$  standard deviation (SD) of three biological repetitions.

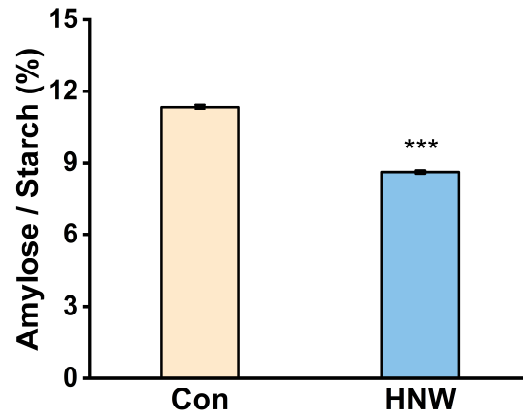

Figure S2 Ratio of amylose in starch from different treatments in stored rice. Values are means  $\pm$  standard deviation (SD) of three biological repetitions. \*\*\* indicate significant difference ( $t$ -test,  $P < 0.001$ ).

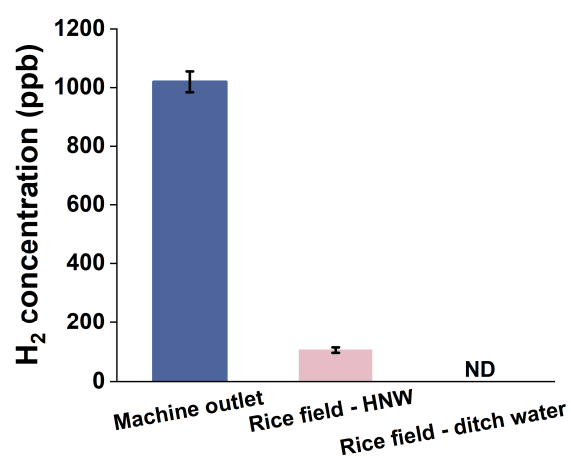

Figure S3 Concentration of H<sub>2</sub> in the machine outlet and fields with different treatments (measured on 27 June 2020). Values are means  $\pm$  standard deviation (SD) of six repetitions in each field randomly. ND: not detected.



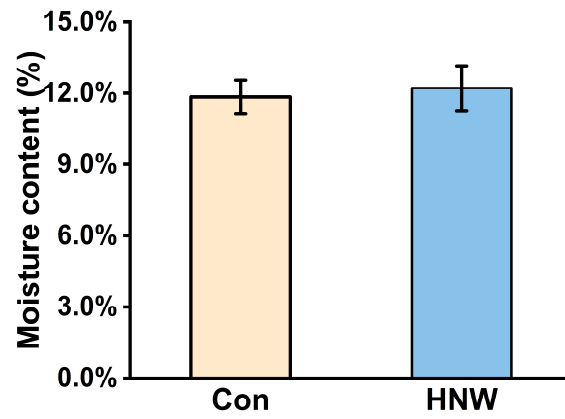

Figure S4 Profiles of moisture content from different treatments in stored rice. Values are means  $\pm$  standard deviation (SD) of three biological repetitions.
